1                   **Transmission of aerosols through pristine and reprocessed N95 respirators**

2  
3 Paul Z. Chen, B.ASc.<sup>1</sup>, Aldrich Ngan, M.ASc.<sup>1</sup>, Niclas Manson, M.P.H.<sup>2</sup>, Jason T. Maynes,  
4 M.D., Ph.D.<sup>2</sup>, Gregory H. Borschel, M.D.<sup>2</sup>, Ori D. Rotstein, M.D.<sup>3</sup>, Frank X. Gu, Ph.D.<sup>1,\*</sup>

5  
6 <sup>1</sup>University of Toronto, Toronto, ON, Canada

7 <sup>2</sup>Hospital for Sick Children, Toronto, ON, Canada

8 <sup>3</sup>St. Michael's Hospital, Toronto, ON, Canada

9  
10 \*Correspondence author: [f.gu@utoronto.ca](mailto:f.gu@utoronto.ca)

11  
12 **Abstract**

13 During the Covid-19 pandemic, pristine and reprocessed N95 respirators are crucial equipment  
14 towards limiting nosocomial infections. The NIOSH test certifying the N95 rating, however,  
15 poorly simulates aerosols in healthcare settings, limiting our understanding of the exposure risk  
16 for healthcare workers wearing these masks, especially reprocessed ones. We used experimental  
17 conditions that simulated the sizes, densities and airflow properties of infectious aerosols in  
18 healthcare settings. We analyzed the penetration and leakage of aerosols through pristine and  
19 reprocessed N95 respirators. Seven reprocessing methods were investigated. Our findings  
20 suggest that pristine and properly reprocessed N95 respirators effectively limit exposure to  
21 infectious aerosols, but that care must be taken to avoid the elucidated degradation mechanisms  
22 and limit noncompliant wear.

23 During the Covid-19 pandemic, disposable N95 filtering facepiece respirators (N95 FFRs) are  
24 crucial equipment towards limiting nosocomial infections.<sup>1</sup> To address critical shortages,  
25 reprocessing is being implemented to facilitate their limited reuse.<sup>2</sup> The N95 rating suggests that  
26 up to 5% of airborne particles may transmit through an N95 FFR. The NIOSH tests certifying  
27 this rating, however, poorly simulate the transmission of aerosols in healthcare settings,<sup>3</sup> limiting  
28 our understanding of the exposure risk for healthcare workers performing aerosol-generating  
29 medical procedures and of the implications of reprocessing.

30 We analyzed the penetration (transmission through the filter media) and leakage  
31 (transmission around imperfections in facial seal) of aerosols into pristine and reprocessed N95  
32 FFRs. We examined three prevalent healthcare models (3M 1860S, 3M 8210 and 3M 9210) and  
33 reprocessed them (1, 3, 5 or 10 cycles) using seven methods under consideration for  
34 implementation in hospitals: autoclave, 70% ethanol vapor (vEtOH), forced-air dry heat (100  
35 °C), humid heat (75% relative humidity, 75 °C), hydrogen peroxide gas plasma (HPGP,  
36 STERRAD® 100S), hydrogen peroxide vapor (HPV, STERIS V-PRO®) and ultraviolet  
37 germicidal irradiation (UVGI). Leakage was assessed via fit testing. Penetration was evaluated  
38 using a polydisperse challenge aerosol (0.1 to 1 µm; material density, 1.05 g/cm<sup>3</sup>) and conditions  
39 that simulated the sizes, densities and airflow properties of infectious aerosols in healthcare  
40 settings (see the Supplementary Appendix for the Experimental design and Methods sections).<sup>4</sup>

41 For both pristine (Fig. 1A) and reprocessed (Fig. S1 to S7) N95 FFRs, penetration rapidly  
42 decreased as aerosol size increased according to a power relationship. Power regression verified  
43 this trend, with a cumulative  $R^2$  of  $0.94 \pm 0.041$  for all penetration experiments in this study ( $N =$   
44 72). For pristine N95 FFRs, the expected aerosol penetration was between 0.09% and 0.19% at  
45 0.1 µm, 0.02% and 0.03% at 0.3 µm and at the detection limit, 0.01%, above 0.5 µm (Fig. 1A).

46 When properly fitted, we measured aerosol leakage at the detection limit, 0.49%, for the  
47 three N95 models (Fig. 1B). As such, the estimated overall transmission (sum of penetration and  
48 leakage) was  $\leq 0.68\%$ , with the most penetrating particle size at 0.1  $\mu\text{m}$ . Improper wear due to a  
49 pinched nose clip, a common issue, significantly enhanced leakage (Fig. 1C).

50 Reprocessing methods varied in their effects on aerosol transmission (Fig. 1D). At 0.3  $\mu\text{m}$ ,  
51 HPV kept overall transmission below 1.5% up to 10 cycles, while force-air dry heat and humid  
52 heat did so up to 3 cycles. HPGP and UVGI did for 1 cycle but increased transmission by the  
53 third cycle; samples reprocessed twice were not included in this study. These five methods kept  
54 leakage below 0.6% for the identified cycles. Autoclave physically deformed the pleated models  
55 (3M 1860S and 3M 8210), inducing leakage; the molded model (3M 9210) was unaffected.  
56 UVGI induced slight dose-dependent photochemical damage (Fig. S8). HPGP caused leakage  
57 around the nose by 5 cycles: reactive oxygen species generated during the plasma phase  
58 progressively embrittled and degraded polyurethane nose foams across N95 models (Fig. S9 and  
59 S10). For mechanistic insight into how reprocessing increased penetration, we measured the  
60 pressure differential, which indicates structural changes, across each FFR. N95 filter media  
61 collect aerosols based on their static charge or structure. Pressure differentials stayed consistent  
62 (Table S1), implying the seven methods increased penetration mainly by degrading filter charge.

63 Equivalence testing demonstrated that N95 FFRs reprocessed once using forced-air dry heat,  
64 HPGP or HPV were statistically equivalent to pristine ones in terms of aerosol transmission (Fig.  
65 1E and S11,  $P < 0.01$  or  $P < 0.001$ ), subverting the conventional expectation that the very act of  
66 reprocessing increases transmission. No N95 FFRs showed equivalency up to 3 cycles (Fig. 1F  
67 and S12,  $P > 0.05$ ).

68 Our findings help better understand aerosol exposure for healthcare workers wearing N95  
69 FFRs. Since the size of SARS-CoV-2 and influenza virions is approximately 0.1  $\mu\text{m}$ ,<sup>5</sup> infectious  
70 aerosols containing them are larger than 0.1  $\mu\text{m}$ . Our results suggest that <0.68% of these virus-  
71 containing aerosols transmit into a pristine N95 FFR. Our data indicates HPV, forced-air dry  
72 heat, humid heat, HPGP and UVGI maintain <1.5% transmission at 0.3  $\mu\text{m}$ , and in some cases  
73 preserve pristine performance, within the identified cycle numbers. The established power  
74 relationship demonstrates penetration decreases considerably as aerosol size increases. In  
75 comparison, improper wear induces significant leakage, highlighting the importance of  
76 compliant wear. These findings suggest pristine and properly reprocessed N95 FFRs effectively  
77 protect against infectious aerosols, but that care must be taken during use and reprocessing to  
78 mitigate degradation of filter charge, avoid deterioration of straps and nose foams, preserve mask  
79 shape especially for molded models and limit noncompliant wear.

**A Penetration plots (pristine N95 FFRs)**

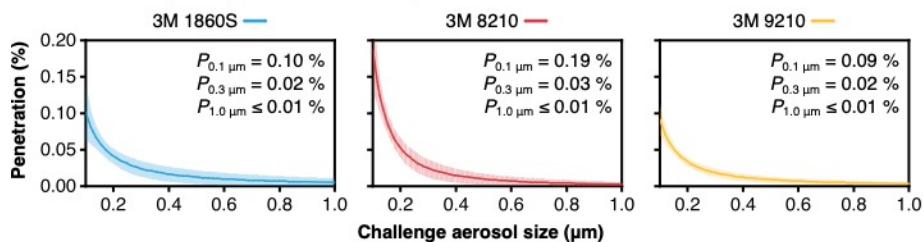

**B Leakage (pristine)**

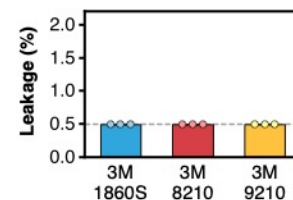

**C Leakage (pinched nose)**

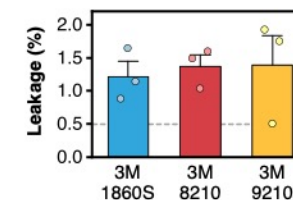

**D Overall transmission and leakage for reprocessed N95 FFRs (at 0.3 μm)**

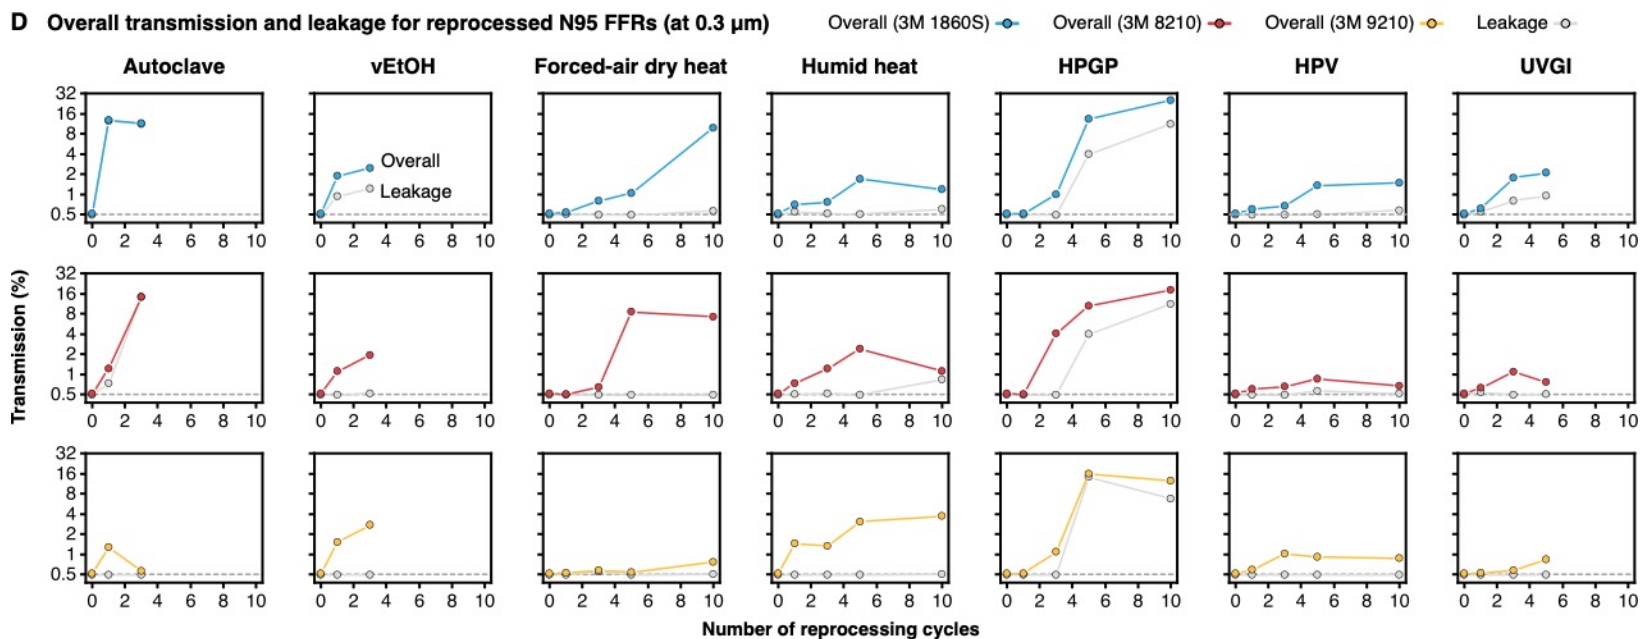

**E Overall transmission (1 cycle for reprocessed N95 FFRs, at 0.3 μm)**

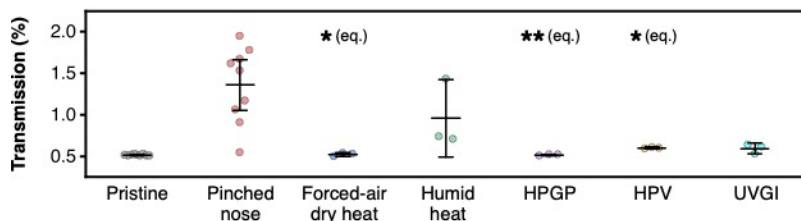

**F Overall transmission (up to 3 cycles for reprocessed N95 FFRs, at 0.3 μm)**

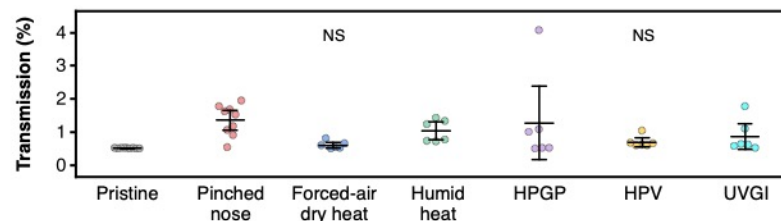

81 **Figure 1. Penetration, leakage and overall transmission of aerosols into pristine and**  
82 **reprocessed N95 FFRs.** (A) Aerosol penetration was measured using three models of pristine  
83 N95 FFRs. A polydisperse challenge aerosol (0.1 to 1.0  $\mu\text{m}$ , material density of 1.05  $\text{g}/\text{cm}^3$ ) was  
84 introduced at 1.0 scfm while experimental conditions were maintained at  $20.9 \pm 0.52$  °C and  $48.5$   
85  $\pm 3.70\%$  RH. Power regression was performed on discrete measurements. Plots show the size-  
86 dependent expectation curves and the 95% confidence intervals of individual samples. The inset  
87 values represent the expected penetration at 0.1, 0.3 and 1.0  $\mu\text{m}$ . The detection limit was 0.01%  
88 across aerosol sizes. (B and C) Aerosol leakage was quantified into three models of pristine N95  
89 FFRs worn properly (B) or with a pinched nose clip (C). Graphs show size-independent means  
90 and their standard errors. The dashed lines indicate the detection limit, which was 0.49%. (D)  
91 The three models of N95 FFRs were reprocessed for 1, 3, 5 or 10 cycles and characterized for  
92 penetration and leakage while worn properly. We only implemented autoclave and vEtOH up to  
93 3 cycles; and UVGI up to 5 cycles. Plots show the overall aerosol transmission, the sum of the  
94 expected penetration and leakage, at 0.3  $\mu\text{m}$  and leakage over cycle numbers. The dashed lines  
95 indicate the detection limit for overall transmission, which was 0.50%. (E and F) Pristine N95  
96 FFRs were compared with ones reprocessed up to 1 cycle (E) or 3 cycles (F). Plots show the  
97 individual data points, means and 95% confidence intervals for overall aerosol transmission at  
98 0.3  $\mu\text{m}$ . Data across N95 models were grouped together up to each cycle number. Autoclave and  
99 vEtOH were excluded from these plots and reported in the Supplementary Appendix.  
100 Equivalence testing compared reprocessed N95 FFRs with pristine ones. \* $P < 0.01$ , \*\* $P < 0.001$ ;  
101 NS, non-significant ( $P > 0.05$ ).

102 **References**

- 103 1. Rational use of personal protective equipment for coronavirus disease (COVID-19) and  
104 considerations during severe shortages: Interim guidance, 6 April 2020. Geneva: World  
105 Health Organization, 2020 (<https://apps.who.int/iris/handle/10665/331695>).
- 106 2. Enforcement policy for face masks and respirators during the coronavirus disease (Covid-  
107 19) public health emergency (revised): Guidance for industry and Food and Drug  
108 Administration staff (FDA-2020-D-1138). Silver Spring, MD: U.S. Food and Drug  
109 Administration, April 2, 2020 (<https://www.fda.gov/media/136449/download>).
- 110 3. 42 CFR 84 - Approval of respiratory protective devices. Washington, DC: National  
111 Institute for Occupational Safety and Health, October 1, 2010  
112 ([https://www.govinfo.gov/content/pkg/CFR-2010-title42-vol1/pdf/CFR-2010-title42-vol1-](https://www.govinfo.gov/content/pkg/CFR-2010-title42-vol1/pdf/CFR-2010-title42-vol1-part84.pdf)  
113 [part84.pdf](https://www.govinfo.gov/content/pkg/CFR-2010-title42-vol1/pdf/CFR-2010-title42-vol1-part84.pdf)).
- 114 4. van Doremalen N, Bushmaker T, Morris DH, et al. Aerosol and surface stability of SARS-  
115 CoV-2 as compared with SARS-CoV-1. N Engl J Med 2020;382:1564-7.
- 116 5. Zhu N, Zhang D, Wang W, et al. A novel coronavirus from patients with pneumonia in  
117 China, 2019. N Engl J Med 2020;382:727-33.

118

119

|     |                                                                                  |         |
|-----|----------------------------------------------------------------------------------|---------|
| 120 | <b>Supplementary Appendix</b>                                                    |         |
| 121 | <b>Transmission of aerosols through pristine and reprocessed N95 respirators</b> |         |
| 122 |                                                                                  |         |
| 123 | <u>Table of Contents</u>                                                         |         |
| 124 | Experimental design                                                              | page 9  |
| 125 | Methods                                                                          | page 12 |
| 126 | Limitations of this study                                                        | page 21 |
| 127 | Supplementary figures                                                            | page 23 |
| 128 | Supplementary table                                                              | page 36 |
| 129 | Author contributions                                                             | page 38 |
| 130 | Acknowledgements                                                                 | page 38 |
| 131 | Supplementary references                                                         | page 38 |



## 132 Experimental design

133 We designed this study to better understand how aerosols relevant to nosocomial infections  
134 transmit through N95 FFRs. The N95 rating means that the FFR filter is not resistant to oil and  
135 that a minimum of 95% of airborne particles are filtered while fitted properly. We chose not to  
136 use the NIOSH certification tests (42 CFR Part 84, TEB-APR-STP-0059 protocol) for our  
137 study.<sup>3,6</sup> This protocol characterizes filtration efficiency by using relatively monodisperse 75-nm  
138 NaCl particles (material density, 2.16 g/cm<sup>3</sup>), using specific humidity conditions  
139 (preconditioning at 85% relative humidity and 38 °C for 24 h) and loading particulate matter up  
140 to the mass threshold (200 mg) under increased flow rates (85 L/min).<sup>6</sup> In healthcare  
141 environments, it is not expected for N95 FFRs to uptake particulates up to the loading threshold.<sup>7</sup>  
142 Moreover, as explained below, the particulates and conditions used in this testing protocol are  
143 dissimilar to the aerosols and conditions of interest for this study.

144 The airflow and transmission characteristics of aerosols depend on the physicochemical  
145 properties of the aerosol and the properties of the surrounding gas. Description of the motion of  
146 spherical aerosols can be formalized by the Maxey and Riley differential force balance, the  
147 relative Reynolds number (Re), Stokes' law and a statistical treatment of Brownian motion.<sup>8-11</sup>  
148 The differential force equation can be written in the  $x$ -direction in Cartesian coordinates as

$$149 \quad \frac{du_a}{dt} = F_D(u - u_a) + \frac{g_x(\rho_a - \rho)}{\rho_a} + F_x, \quad (1)$$

150 where  $u_a$  is the aerosol particle velocity,  $t$  is time,  $F_D(u - u_a)$  is the drag force per unit particle  
151 mass,  $\rho_a$  is the aerosol particle material density,  $\rho$  is the fluid (in our case, gas) material density  
152 and  $F_x$  accounts for additional forces acting on the system. The relative Reynolds number is  
153 defined as

154 
$$\text{Re} = \frac{\rho D_a |u_a - u|}{\mu}, \quad (2)$$

155 where  $D_a$  is the aerosol particle diameter,  $u$  is the fluid velocity and  $\mu$  is the dynamic viscosity of  
156 the fluid. For submicron aerosol particles, Stokes' law describes

157 
$$F_D = \frac{18\mu}{D_a^2 \rho_a C_c}, \quad (3)$$

158 where the Cunningham correction factor is defined as

159 
$$C_c = 1 + \frac{2\lambda}{D_a} \left\{ 1.257 + 0.4 \exp \left[ -1.1 \left( \frac{D_a}{2\lambda} \right) \right] \right\}, \quad (4)$$

160 where  $\lambda$  is the molecular mean-free path of the aerosol particle. When including the forces  
161 required to accelerate the fluid surrounding the particle and due to a pressure gradient in the  
162 fluid, the additional force term in eq. (1) can written as

163 
$$F_x = \frac{1}{2} \frac{\rho}{\rho_a} \frac{d}{dt} (u - u_a) + \frac{\rho}{\rho_a} u_a \frac{du}{dx}. \quad (5)$$

164 The effects of Brownian motion, which are important for smaller aerosols, can be included as  
165 well. The amplitudes of the Brownian forces components are described by

166 
$$F_{b,i} = \zeta_i \sqrt{\frac{\pi S_0}{\Delta t}}, \quad (6)$$

167 where  $\zeta_i$  are zero-mean, unit-variance-independent Gaussian random numbers at time step  $i$ . The  
168 components of the Brownian forces can be modeled as a Gaussian white noise process with  
169 spectra intensity  $S_{ij}^n$  defined as

170 
$$S_{ij}^n = S_0 \delta_{ij}, \quad (7)$$

171 where  $\delta_{ij}$  is the Kronecker delta and

172 
$$S_0 = \frac{216\nu\sigma T}{\pi^2 \rho D_a^5 (\rho_a/\rho)^2 C_c}, \quad (8)$$

173 where  $T$  is the absolute temperature and  $\nu$  is the kinematic viscosity.

174 Taken together, eqs. (1) to (8) show that airflow and transmission characteristics of aerosols  
175 depend on the size, material density, surface charge and morphology of the aerosol as well as the  
176 composition, flow and temperature of the surrounding gas.

177 While, at the time of writing,<sup>12</sup> Covid-19 is believed to be communicated through the droplet  
178 and contact modes of transmission,<sup>13,14</sup> aerosol-generating medical procedures (AGMPs)  
179 discharge aerosols (conventionally,  $<5 \mu\text{m}$ ), potentially leading to nosocomial infection.<sup>15</sup> Other  
180 infectious diseases, such as influenza, can induce respiratory infection via the airborne mode of  
181 transmission. Both SARS-CoV-2 and influenza virions are approximately  $0.1 \mu\text{m}$  in size and can  
182 be spherical.<sup>16,17</sup> Infectious aerosols and droplet nuclei carrying SARS-CoV-2 and influenza are  
183 largely spherical, have a material density of approximately  $1 \text{ g cm}^{-3}$ , have a  $\zeta$ -potential modestly  
184 below zero and are polydisperse but, by definition,  $>0.1 \mu\text{m}$  based on the size of the virions.<sup>18-20</sup>

185 For this study, we considered the above parameters and healthcare-relevant experimental  
186 conditions to investigate how aerosols penetrate through and leak into N95 FFRs. We chose a  
187 polydisperse ( $0.1$  to  $1.0 \mu\text{m}$ ) challenge aerosol of spherical Latex polystyrene beads (material  
188 density,  $1.05 \text{ g cm}^{-3}$ ;  $\zeta$ -potential  $< 0$ , although aerosols were charge neutralized during  
189 experimentation for a  $\zeta$ -potential modestly below zero). Preliminary findings showed that  
190 penetration followed a power relationship with aerosol size so that the behavior of aerosols larger  
191 than  $1.0 \mu\text{m}$  could be extrapolated using the experimental size range; we did not include aerosols  
192 between  $1$  and  $5 \mu\text{m}$  in this study. For our experimental conditions, we simulated ambient  
193 healthcare conditions and its gaseous phase, accounting for the relevant density, dynamic  
194 viscosity, breathing rates, ambient temperature, relative humidity (RH), ambient pressure.  
195 Further details are included in the Methods section below.

196 Methods

197 *Implementation of reprocessing methods for N95 FFRs*

198 The seven reprocessing methods assessed in this study include traditional sterilization and  
199 decontamination methods in medical settings, emerging ones and processes that have received  
200 emergency use authorization (EUA) from the U.S. Federal Drug Administration (FDA).<sup>21-27</sup> Each  
201 reprocessing method, and number of cycles (1, 3, 5 or 10), was evaluated against three models of  
202 NIOSH-approved N95 FFRs (3M 1860S, 3M 8210 and 3M 9210, The 3M Company, St. Paul,  
203 MN, USA). These models are used widely by healthcare workers (HCWs) and vary in mask  
204 design (molded or pleated), strap material (polyisoprene, thermoplastic elastomer and blue  
205 polyisoprene for 3M 1860S, 3M 8210 and 3M 9210, respectively) and the presence (3M 1860S)  
206 or absence of a colored dye on the exterior surface. All reprocessed N95 FFRs were  
207 characterized for leakage or penetration after one day or longer after the last cycle was  
208 completed, as described below. Each reprocessing cycle was run using standard parameters or  
209 one that have been reported as used for decontamination.<sup>21-27</sup>

210 For autoclave reprocessing, the N95 FFRs were placed inside of a benchtop autoclave  
211 sterilizer (3850E Autoclave, Tuttnauer, Hauppauge, NY, USA), such that no FFR touched  
212 another one. For each cycle, they were run under the dry setting (steam time, 30 min) with a 60-  
213 min dry time. The N95 FFRs were removed from the autoclave and allowed to sit idly in ambient  
214 conditions (30 min) before proceeding.

215 For vEtOH (70%) reprocessing, we prepared 70% EtOH by mixing the appropriate ratio of  
216 ethanol (Sigma-Aldrich, Oakville, ON, Canada) with MilliQ water (18.2 MΩ cm, Milli-Q® IQ  
217 7000 Ultrapure Lab Water System; Millipore Sigma, Etobicoke, ON, Canada). A vapor, vEtOH  
218 (70%), was generated via a thin-layer chromatography atomizer (Chemglass Life Sciences,

219 Vineland, NJ, USA) and a fume hood air supply (operated at ~25 psi). For each cycle, the N95  
220 FFRs were covered with vEtOH (70%) and allowed to dry completely under hood ventilation (~1  
221 h) before proceeding.

222 For forced-air dry heat (100 °C) reprocessing, the N95 FFRs were placed within a benchtop  
223 forced air oven (chamber volume, 3.65 ft<sup>3</sup>, VWR® Forced Air Oven; VWR International,  
224 Mississauga, ON, Canada), such that no FFR touched another one. For each cycle, the N95 FFRs  
225 were heated to 100 °C (ramp time, ~2 min) for 30 min. Afterwards, they were removed from the  
226 heat and allowed to cool down to and sit idly at room temperature in ambient conditions (30 min)  
227 before proceeding.

228 For humid heat (75% RH, 75 °C) reprocessing, the N95 FFRs were enclosed within  
229 STERIL-PEEL® sterilization pouches (GS Medical Packaging, Inc., Etobicoke, ON, Canada)  
230 and placed in a convection heating system with controlled humidity (HCSS74W12, Climate  
231 Select Heated Holding Cabinet with Humidity, BevLes Company, Inc., Erie, PA, USA). A  
232 humidity gauge (PT2470 Digital Combometer, Exo Terra, Montreal, QC, Canada) was used to  
233 ensure that the RH was maintained. For each cycle, the N95 FFRs were heated at 75 °C with  
234 75% RH for 1 h. Afterwards, N95 FFRs were removed from the heat and allowed to cool down  
235 in ambient conditions (5 min) before proceeding.

236 For HPGP reprocessing, the N95 FFRs were enclosed within Tyvek® self-seal sterilization  
237 pouches (GS Medical Packaging, Inc., Etobicoke, ON, Canada) and placed in a STERRAD®  
238 100S Sterilizer (Advanced Sterilization Products, Irvine, CA, USA). The N95 FFRs were run  
239 through the STERRAD® 100S Long Cycle (59% H<sub>2</sub>O<sub>2</sub>; approximately 72 min per cycle,  
240 including venting; 42-50°C; cycle pressure, fluctuated from vacuum to sterilant injection and  
241 diffusion to plasma settings with range of 0.3-14.0 Torr). STERRAD® chemical indicator strips

242 (Advanced Sterilization Products, CA, USA) within the sterilization pouches verified exposure  
243 during each cycle. The enclosed N95 FFRs were handled after venting.

244 For HPV reprocessing, the N95 FFRs were enclosed within Vis-U-All™ Low Temperature  
245 Sterilization Pouches (STERIS Corporation, OH, USA) and placed in a STERIS V-PRO® maX  
246 Low Temperature Sterilization System (STERIS Corporation, OH, USA). Each cycle was run  
247 under the non-lumen cycle settings (59% H<sub>2</sub>O<sub>2</sub>, approximately 28 min per cycle, including  
248 aeration, 49.3-50.6 °C; cycle pressure, fluctuated from vacuum to sterilant injection settings with  
249 4 pulsations varying from 1-504 Torr). Chemical indicator strips (STERIS Corporation, Ohio,  
250 USA) within the sterilization pouches verified exposure during each cycle. The enclosed N95  
251 FFRs were handled after aeration.

252 For UVGI reprocessing, we constructed an aluminum enclosure containing a SaniRay®  
253 RRDHO36-4S High-Output Germicidal Ultraviolet Fixture (Atlantic Ultraviolet Corporation,  
254 Hauppauge, NY, USA) with four 254-nm UVC lamps (UV 05-1060-R, Atlantic Ultraviolet  
255 Corporation, Hauppauge, NY, USA) mounted in parallel. The enclosure measured 106.68 cm x  
256 60.96 cm x 60.96 cm and was built with an aluminum door to safely introduce and remove  
257 samples while containing radiation during operation. A height-adjustable platform was installed  
258 and set to 30.48 cm below the lamps for this application. The lamps were warmed up (2 h) to  
259 stabilize the UVC irradiance. A UV512C Digital UVC Light Meter (General Tools &  
260 Instruments, Secaucus, NJ, USA) was used inside of the enclosure at a fixed position to account  
261 for potential fluctuations of UVC irradiation. The UVC irradiance at different areas on the N95  
262 FFRs were mapped using a USB4000 fiber optic spectrometer (Ocean Optics, Dunedin, FL,  
263 USA) with a CC-3 Cosine Corrector (Ocean Optics, Dunedin, FL, USA) using 25-scan averages.  
264 The results indicated that for the face-side up orientation, the edges of the mask received 57.6%

265 of the irradiance, while the center of the mask received 145.3% of the dose, based on the  
266 reference UVC meter. For the face-side down orientation, zones with the lowest irradiance and  
267 highest irradiance received 79.4% and 137.3% of the measured reference irradiance,  
268 respectively. The N95 FFRs were placed within the UVC enclosure and irradiated face-side up  
269 such that all areas on the face-side up orientation received a minimum of  $\sim 0.5 \text{ J/cm}^2$ , while being  
270 rotated  $90^\circ$  in 30-s intervals to ensure homogeneous dosing. The FFRs were then flipped face-  
271 side down and irradiated in the same manner. The process was repeated such that all areas of the  
272 N95 FFRs received  $\sim 1 \text{ J/cm}^2$  of UVC or greater. The least exposed areas of the face-up  
273 orientation received a UVC dose of  $1.010 \pm 0.035 \text{ J/cm}^2$  at an irradiance of  $2431 \pm 179 \mu\text{W/cm}^2$ ,  
274 while the least exposed areas of the face-down orientation received  $1.029 \pm 0.039 \text{ J/cm}^2$  at  $3537$   
275  $\pm 199 \mu\text{W/cm}^2$ .

276

### 277 *Characterization of leakage*

278 We characterized leakage via quantitative fit testing. For each pristine N95 FFRs, fit-verified  
279 individuals donned and molded an N95 FFRs before assessing leakage. For each reprocessed  
280 N95 FFRs, fit-verified individuals (fit factor for pristine masks, 200+) donned and molded an  
281 N95 FFRs, doffed it, had it reprocessing using the specified method and number of cycles, and  
282 re-donned and molded it to assess leakage. Fit testing was performed using the CSA Z94.4-11  
283 testing standard (PortaCount Respirator Fit Tester 8048, TSI Incorporated, Shoreview, MN,  
284 USA), fulfilling OSHA 29CFR 1910.134. Briefly, a sequence of breathing exercises (normal  
285 breathing, deep breathing, breathing while turning head side to side, breathing while nodding  
286 head up and down, breathing while talking out loud, breathing while bending over and, again,  
287 normal breathing) was performed in the proximity of an aerosol generator (Model 8026, TSI

288 Incorporated; generated aerosols containing NaCl particles, 0.02  $\mu\text{m}$  to  $>1.0 \mu\text{m}$ ). Since the  
289 testing standard and the condensation nuclei counter within the PortaCount instrument  
290 exclusively assesses particles between 40 and 70 nm, only particles that leaked through  
291 imperfections in facial seal were quantified, rather than those that penetrate through the filter  
292 media. These results correspond to leakage due to larger aerosols.<sup>28</sup>

293 Fit factor ( $FF$ ) is defined by

$$294 \quad FF = \frac{7}{\frac{1}{ff_1} + \frac{1}{ff_2} + \frac{1}{ff_3} + \frac{1}{ff_4} + \frac{1}{ff_5} + \frac{1}{ff_6} + \frac{1}{ff_7}}, \quad (9)$$

295 where  $ff_i$  is the individual fit score for the  $i$ -th exercise. Since  $FF$  is the mean geometric ratio  
296 between the concentrations of the test aerosol inside and outside of the N95 FFR ( $C_{in}/C_{out}$ ),  
297 leakage was calculated as the inverse ( $L = FF^{-1}$ ). Within the relevant aerosol size range,  
298 leakage is a bulk, size-independent measurement, as leakage occurs through macroscopic  
299 imperfection of facial seal. Hence, we took leakage to be a constant value throughout the  
300 penetration challenge aerosol range (0.1 to 1.0  $\mu\text{m}$ ) when calculating overall transmission. To  
301 ensure consistent results (sensitivity, 0.10%), ambient counts were generally maintained above  
302 150 throughout each test. The output value of the testing standard saturates at 200+. Since an  
303 output  $FF$  of 200 corresponds to a leakage of 0.5% and the sensitivity was 0.10%, we considered  
304 the limit of detection to be 0.49%.

305 For reprocessed N95 FFRs, leakage measurements were ensured to exclusively quantify the  
306 effect of reprocessing. When re-donning a reprocessed N95 FFR, there is a risk that leakage  
307 occurs due to human-based error. To mitigate this issue, fit-verified individuals re-donned  
308 reprocessed N95 FFRs while viewing the live  $FF$ . The live  $FF$  was maximized before testing,  
309 meaning that increases in leakage were due to the effects of a reprocessing method and number  
310 of cycles.



311 HCWs widely exhibit one or more behaviors of improper wear for N95 FFRs, such as  
312 pinching the nose clip while molding the mask.<sup>29,30</sup> We simulated this common compliance  
313 issue. Fit-verified individuals donned and molded a pristine N95 FFR without viewing the live  
314 *FF*. While doing so, they molded the nose clip outward in, rather than the recommended inward  
315 out, thereby pinching the nose clip and creating a relatively sharp bend at the apex of the nose  
316 clip. Leakage was then quantified for these masks.

317

### 318 *Characterization of penetration and pressure differential*

319 Penetration experiments were performed at SGS-IBR Laboratories (Grass Lakes, MI, USA).  
320 These aerosols and experimental conditions simulated those found in healthcare settings and for  
321 moderate HCW breathing through N95 FFRs.<sup>31,32</sup> To standardize experimentation, penetration  
322 measurements were conducted according to particle filtration efficiency measurements for  
323 ASTM F2299 and ASTM F2100.<sup>33,34</sup> As previously introduced, we characterized penetration  
324 using a polydisperse aerosol of negatively charged spherical Latex polystyrene beads. Briefly,  
325 we mixed monodisperse aqueous suspensions of Latex polystyrene microspheres for a  
326 polydisperse distribution of challenge particles (0.1  $\mu\text{m}$  to 1  $\mu\text{m}$ ; material density, 1.05  $\text{g cm}^{-3}$  at  
327 20 °C). Filtered and dried air was passed through a nebulizer to produce an aerosol containing  
328 the suspended Latex microspheres. The aerosol was passed through a charge neutralizer, leading  
329 to a  $\zeta$ -potential modestly below 0, and mixed and diluted with additional preconditioned air to  
330 produce the challenge aerosol to be used in the test. N95 FFRs were tested previously for leakage  
331 and contained fit test sampling probes (TSI Incorporated, Shoreview, MN, USA). Leftover  
332 sample probes were sealed with hot glue, and control N95 FFRs with sealed probes were  
333 indistinguishable from control ones without them based on penetration and pressure differential

334 measurements. N95 FFRs were attached to a filter holder and placed between inflow and outflow  
335 tubes. The aerosol was fed (1.0 scfm) through the FFRs, and penetration was obtained using two  
336 particle counters (Lasair® III 110 Airborne Particle Counter, Particle Measuring Systems®, a  
337 Spectris company Boulder, CO, USA) connected to the feed stream and filtrate. Penetration was  
338 measured within six size channels (0.1 to 0.15  $\mu\text{m}$ , 0.15 to 0.20  $\mu\text{m}$ , 0.20 to 0.25  $\mu\text{m}$ , 0.25 to  
339 0.30  $\mu\text{m}$ , 0.3 to 0.5  $\mu\text{m}$  and 0.5 to 1.0  $\mu\text{m}$ ). For power regression (described in the section  
340 below), we took the measured penetration within each channel to be the middle of its size  
341 channel (0.125  $\mu\text{m}$ , 0.175  $\mu\text{m}$ , 0.225  $\mu\text{m}$ , 0.275  $\mu\text{m}$ , 0.4  $\mu\text{m}$  and 0.75  $\mu\text{m}$ ). This was justified  
342 based on high coefficients of determination ( $R^2$ ) throughout the samples in this study and  
343 because expectation values for penetration were conservative estimates, with expected  
344 penetration typically being slightly greater than the experimental values. Pressure differential  
345 (DHII-007, Dwyer Instruments International, Michigan City, IN, USA), air flow (M-50SLPM-  
346 D/5M, Alicat Scientific, Tucson, AZ, USA), temperature and humidity (HMT330 Humidity and  
347 Temperature Meter, Vaisala, Helsinki, Finland) and barometric pressure (PTU200 Transmitter,  
348 Vaisala, Helsinki, Finland) were also characterized in the experimental apparatus. Pressure  
349 differential was measured for greater mechanistic insight into how reprocessing affected  
350 penetration.<sup>26</sup> Throughout the penetration experiments, the temperature, relative humidity and  
351 barometric pressure were measured to be  $20.9 \pm 0.52$  °C,  $48.5 \pm 3.70$  % and  $723.6 \pm 2.72$  mmHg,  
352 respectively. Note that higher RH values (e.g., 80%, like the preconditioning stage for the  
353 NIOSH test) is not expected to affect penetration measurements.<sup>35</sup>

354

### 355 *Statistical analyses*

356 For power regression, the statistical model had the traditional nonlinear form,

357 
$$\mathbf{y} \sim f(\mathbf{x}, \boldsymbol{\beta}). \quad (10)$$

358 We fitted the discrete aerosol penetration measurements for each sample according to the model

359 
$$P = cD_a^{-k}, \quad (11)$$

360 where  $P$  is the expected penetration,  $c$  is the scaling constant,  $D_a$  is the aerosol size and  $k$  is the  
361 determined power law exponent. We used the least squares estimator

362 
$$\hat{\boldsymbol{\beta}} \approx (\mathbf{J}^T \mathbf{J})^{-1} \mathbf{J}^T \mathbf{y} \quad (12)$$

363 and assumed that the model could be approximated using a first-order Taylor series

364 
$$f(x_i, \boldsymbol{\beta}) \approx f(x_i, 0) + \sum_j \frac{\partial f(x_i, \boldsymbol{\beta})}{\partial \beta_j} \beta_j. \quad (13)$$

365 Expectation curves and confidence bands were generated using these approximations at a  
366 sufficient number of intervals ( $n = 50$ ) throughout the axes spans and by linearly connecting  
367 them. We applied power regression to the discrete penetration data from individual samples. A  
368 strong cumulative coefficient of determination ( $R^2$ ,  $0.94 \pm 0.041$ , mean  $\pm$  S.E.M.) across all  
369 samples included in this study suggested that this power law was a good model for the  
370 relationship between penetration and aerosol size.

371 We performed equivalence testing to compare the likeness of the aerosol transmission  
372 characteristics of pristine N95 FFRs and reprocessed ones. We applied the conventional two-  
373 one-sided t-test procedure<sup>36</sup> and took the ratio between overall transmission for all N95 FFRs,  
374 including across models, that were reprocessed using a certain method and number of cycles and  
375 all properly worn, pristine N95 FFRs. Since equivalence bounds are not standardized in this  
376 field, we used the U.S. FDA's standard bounds for bioequivalence (upper equivalence bound =  
377 1.25, lower equivalence bound = 0.80, based on the geometric mean ratio).<sup>36</sup> N95 FFRs  
378 reprocessed using each method for one cycle were tested first. For some reprocessing methods,  
379 our results showed rejection of the null hypothesis ( $P < 0.01$  and  $P < 0.001$ ). If these reprocessed

380 masks accepted the null hypothesis ( $P > 0.05$ ), we did not perform equivalence testing for higher  
381 cycle numbers. N95 FFRs reprocessed using three methods passed at one cycle, but none did at  
382 three cycles.

383 Limitations of this study

384 *Composition of matter for N95 FFRs*

385 The three models of N95 FFRs used in this study span a range of mask designs and  
386 constituent materials and are widely used by HCWs. Nevertheless, there are other models and  
387 brands used by HCWs which may differ in the composition of matter. Of note, the three 3M  
388 models studied use an electret for the filter media that can restore static charge over time.<sup>37</sup> Since  
389 we found that reprocessing mainly increased aerosol penetration by degrading filter charge, our  
390 results may underestimate the impact of certain reprocessing methods on aerosol penetration for  
391 N95 brands and models without electret properties. The N95 FFRs used in this study included  
392 those from several batches manufactured years apart. Differences arising from batch  
393 manufacturing may be encapsulated in this study. Batch manufacturing may also skew the  
394 transmission characteristics of an N95 FFR.

395

396 *Relevance to reprocessing N95 FFRs in healthcare settings*

397 This study focuses on the direct assessment of aerosol transmission for pristine, improperly  
398 worn pristine and reprocessed, but properly worn, N95 FFRs. Our results help to understand the  
399 exposure risk for HCWs performing AGMPs or near other sources of infectious aerosols. They  
400 also help to understand the implications of reprocessing. We did not, however, investigate the  
401 effects of HCW wear, especially when extended-use guidelines are implemented. In addition, the  
402 field does not currently understand the extensiveness and impact of extended-use guidelines on  
403 noncompliance in wear. These, and additional contributions, may adversely affect the aerosol  
404 transmission characteristics of N95 FFRs in healthcare settings. For example, we showed that at  
405 one cycle of forced-air dry heat, HPGP or HPV reprocessed N95 FFRs were statistically

406 equivalent to pristine ones in terms of aerosol transmission. This result does not account for the  
407 effects of extended wear, which may affect performance. In addition, for proper experimental  
408 design, we evaluated leakage on fit-verified individuals who had an optimal fit factor (200+).  
409 Since quantitative fit testing considers a fit factor of 100 to be a pass, some institutions may  
410 allow HCWs to wear N95 FFRs that do not fit optimally, increasing leakage by a predictable  
411 amount. From one perspective, the results in this study can be taken as approximate better-case  
412 scenarios (i.e., upper bounds), especially for greater reprocessing cycle numbers. For proper  
413 clinical implementation of reprocessing for N95 FFRs, the effects of the aforementioned  
414 contributions on filtration performance should be studied.

415 Supplementary figures

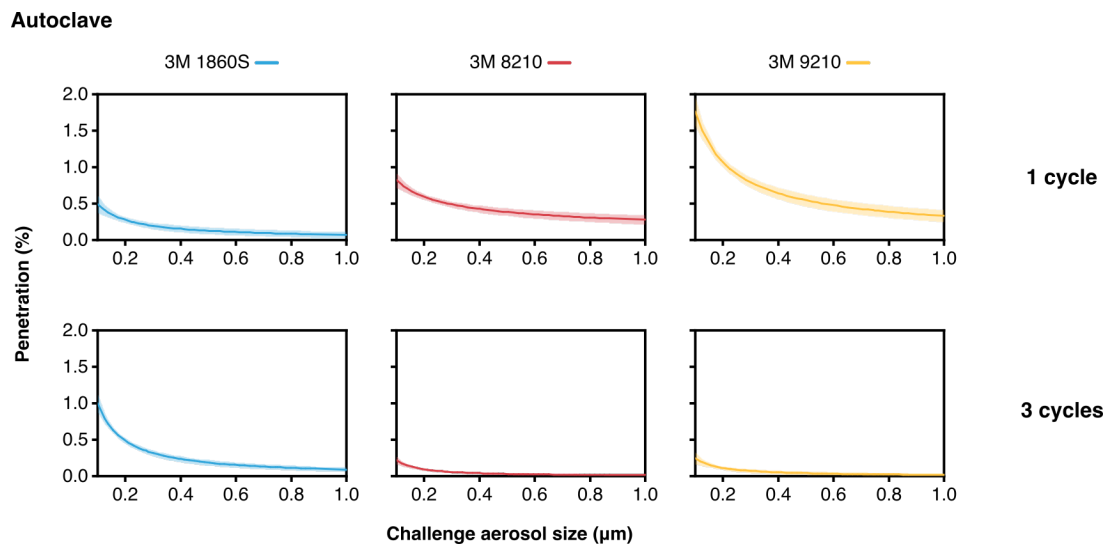

416

417 **Figure S1.** Penetration plots for N95 FFRs that were reprocessed via autoclave for 1 or 3 cycles.

418 Samples were not reprocessed using autoclave for 5 or 10 cycles. Curves and bands depict the

419 expectation line and its 95% confidence band, respectively, from power regression for individual

420 samples.

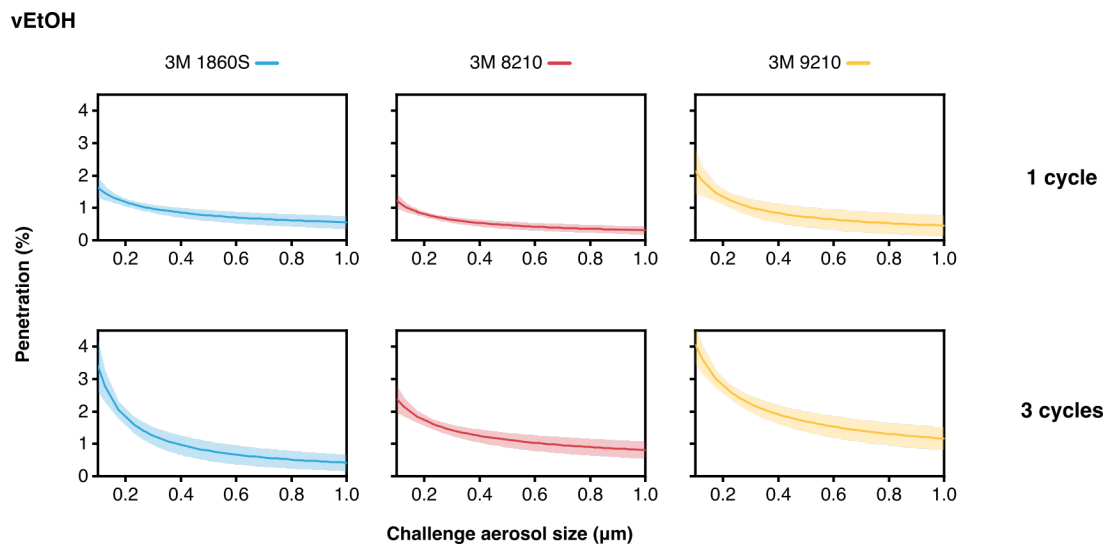

421

422 **Figure S2.** Penetration plots for N95 FFRs that were reprocessed via vEtOH (70%) for 1 or 3  
423 cycles. Samples were not reprocessed using autoclave for 5 or 10 cycles. Curves and bands  
424 depict the expectation line and its 95% confidence band, respectively, from power regression for  
425 individual samples.



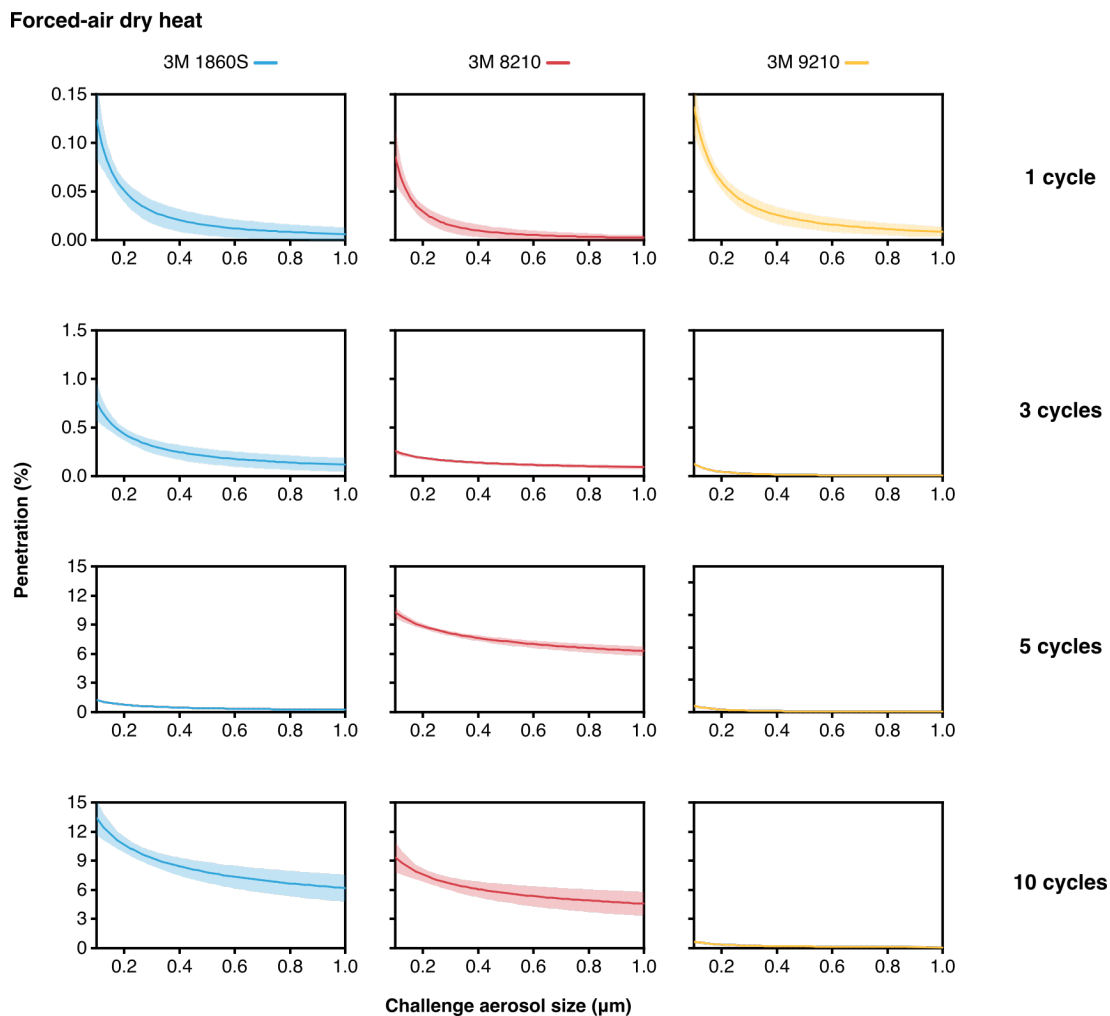

426

427 **Figure S3.** Penetration plots for N95 FFRs that were reprocessed via forced-air dry heat (100 °C)

428 for 1, 3, 5 or 10 cycles. Curves and bands depict the expectation line and its 95% confidence

429 band, respectively, from power regression for individual samples.

Humid heat

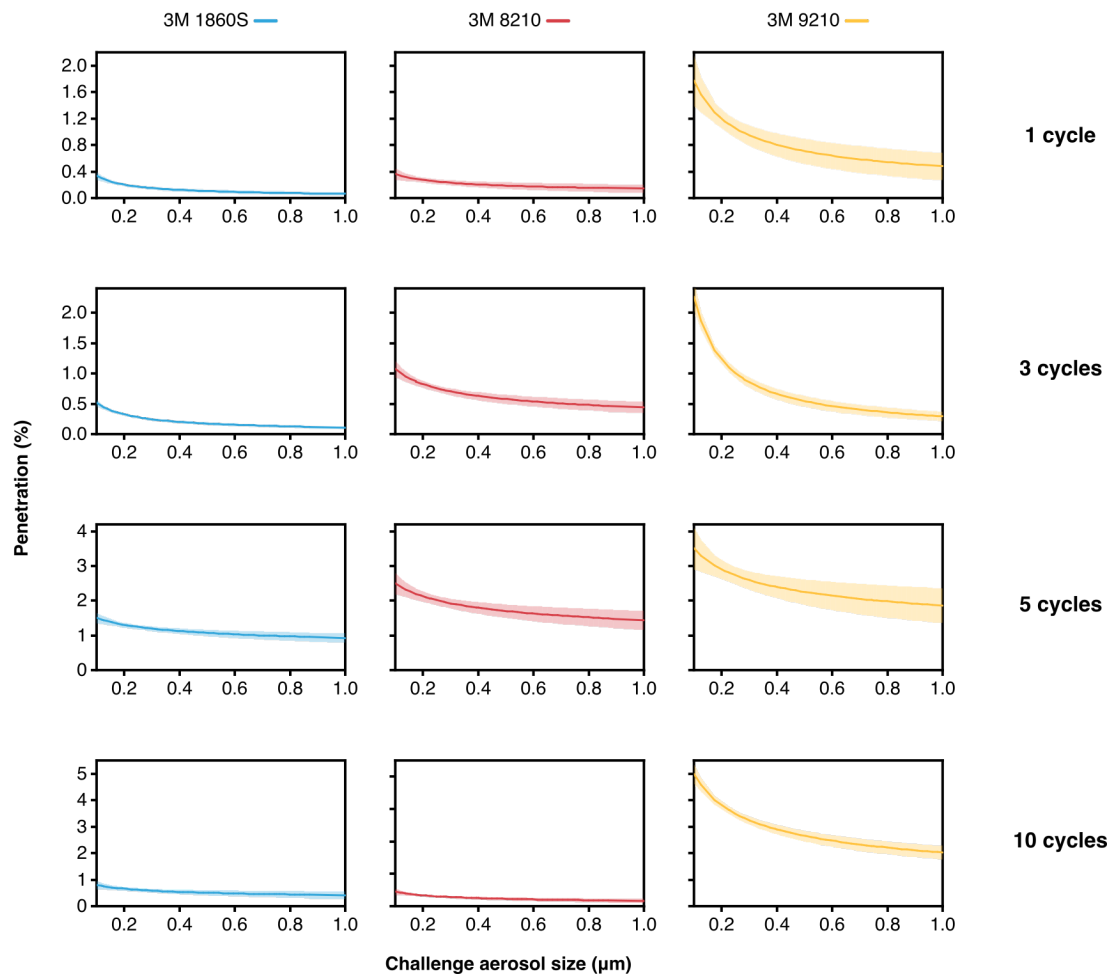

430

431 **Figure S4.** Penetration plots for N95 FFRs that were reprocessed via humid heat (75% RH, 75  
432 °C) for 1, 3, 5 or 10 cycles. Curves and bands depict the expectation line and its 95% confidence  
433 band, respectively, from power regression for individual samples.

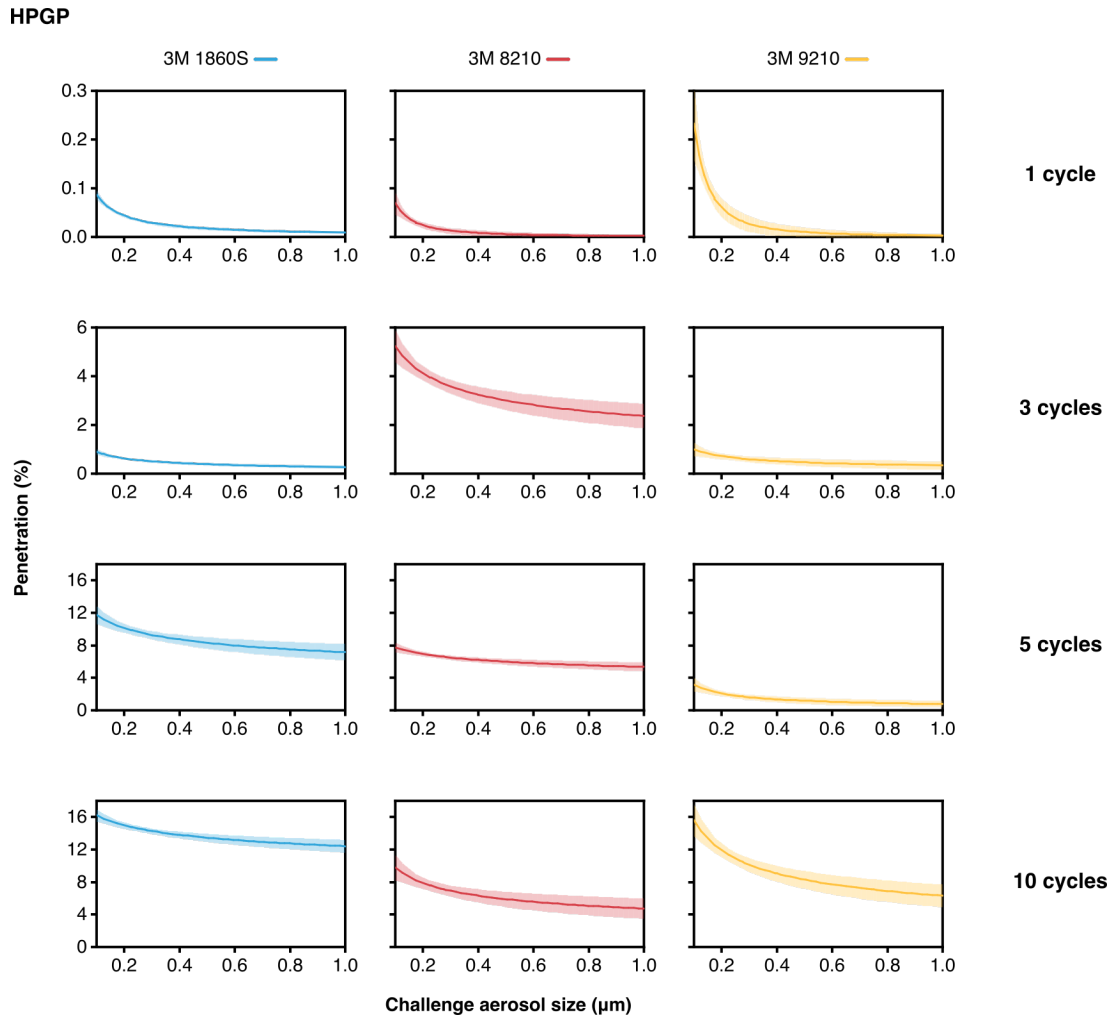

434

435 **Figure S5.** Penetration plots for N95 FFRs that were reprocessed via HPGP (STERRAD® 100S)

436 for 1, 3, 5 or 10 cycles. Curves and bands depict the expectation line and its 95% confidence

437 band, respectively, from power regression for individual samples.

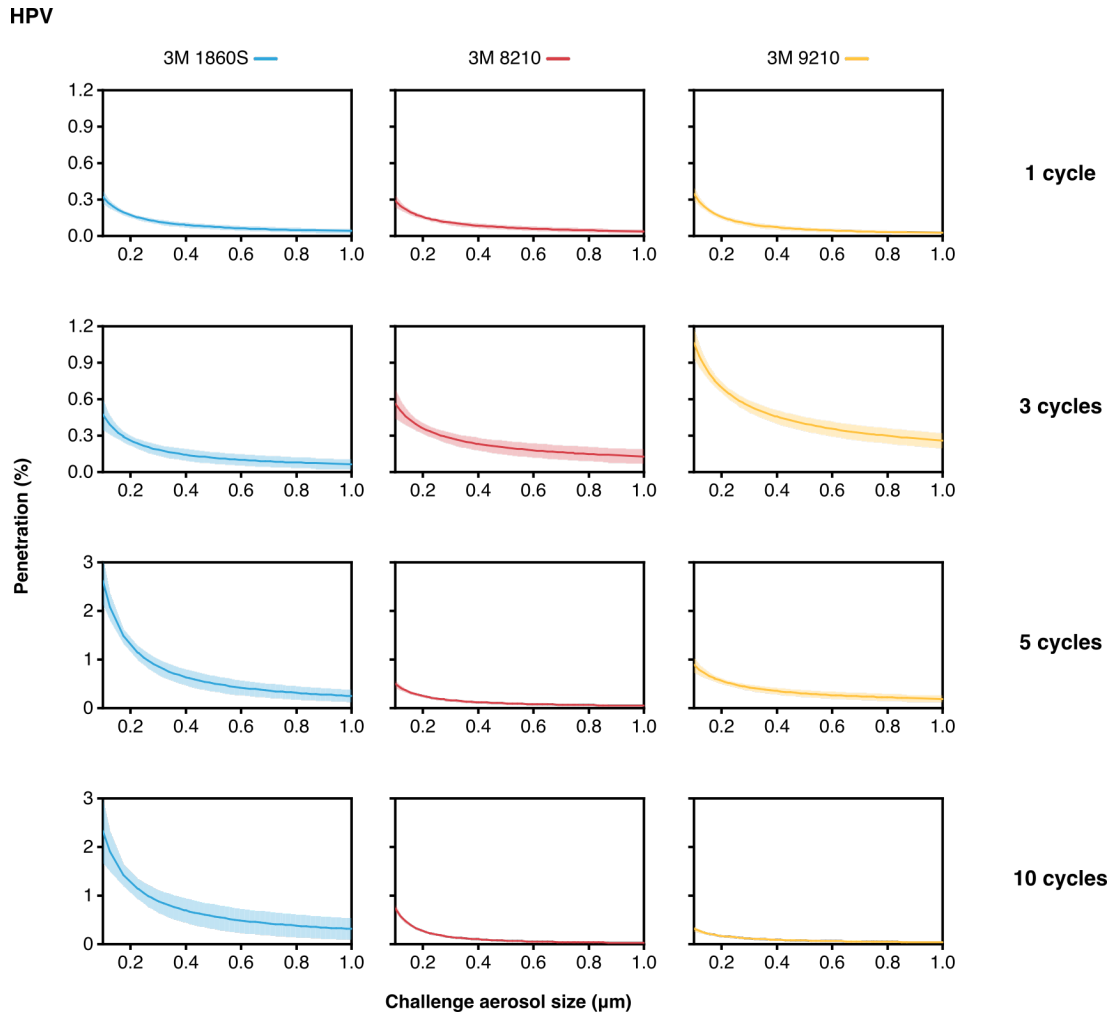

438

439 **Figure S6.** Penetration plots for N95 FFRs that were reprocessed via HPV (STERIS V-PRO®)

440 for 1, 3, 5 or 10 cycles. Curves and bands depict the expectation line and its 95% confidence

441 band, respectively, from power regression for individual samples.

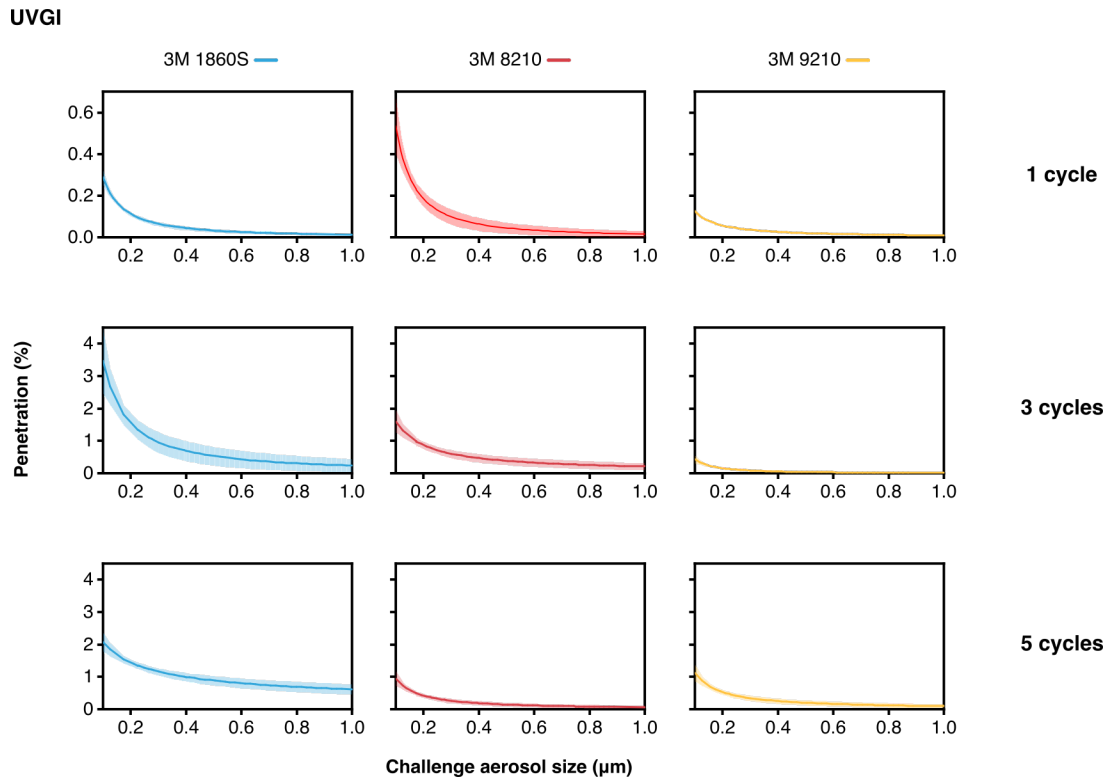

442

443 **Figure S7.** Penetration plots for N95 FFRs that were reprocessed via UVGI for 1, 3 or 5 cycles.

444 Samples were not reprocessed using autoclave for 10 cycles. Curves and bands depict the

445 expectation line and its 95% confidence band, respectively, from power regression for individual

446 samples.

447

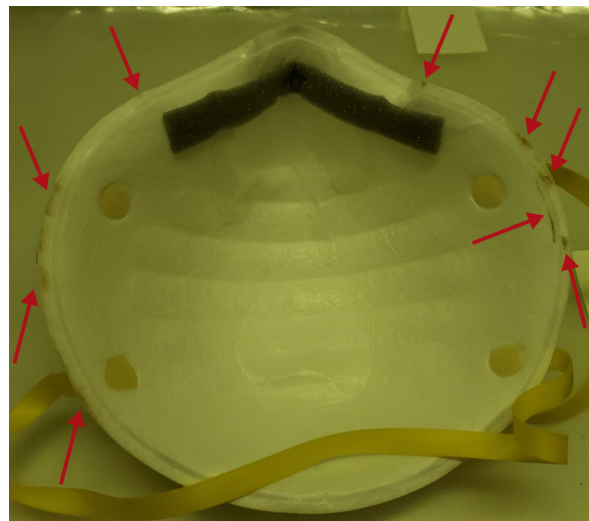

448

449 **Figure S8.** UVGI reprocessing can potentially induce dose-dependent photochemical damage to  
450 N95 FFRs. Image of an N95 FFR (3M 8210) that has undergone 3 reprocessing cycles and  
451 displays slight damage, as depicted by the red arrows.

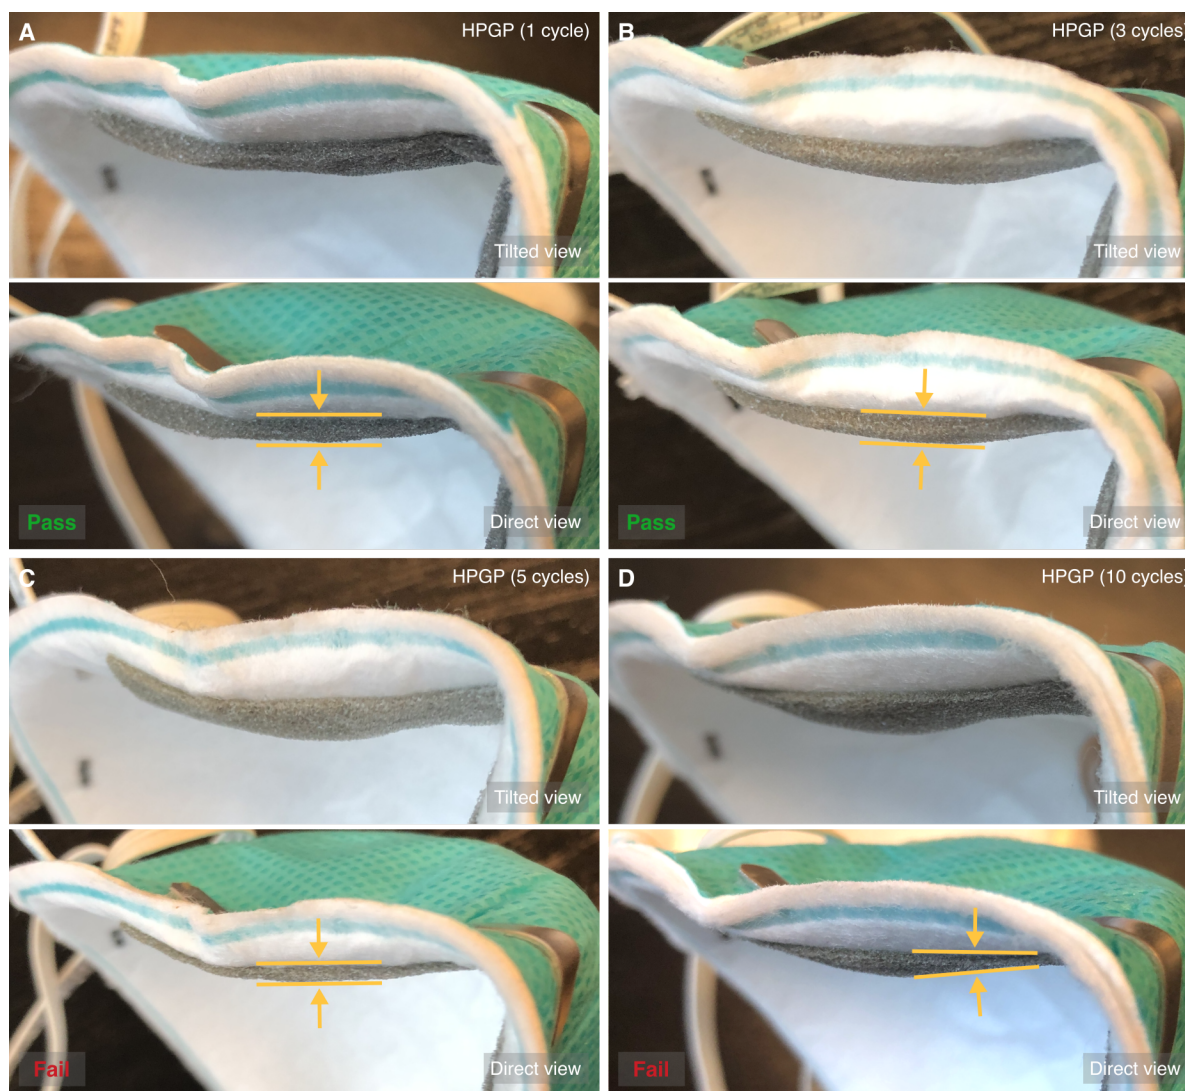

452  
453 **Figure S9.** HPGP (STERRAD® 100S) reprocessing degrades the polyurethane nose foam of  
454 N95 FFRs. Tilted (top) and direct (bottom) images of the nose foam of 3M 1860S FFRs after 1  
455 cycle (A), 3 cycles (B), 5 cycles (C) and 10 cycles (D) of HPGP reprocessing. Pass or fail refers  
456 to the results from quantitative fit testing. At 5 and 10 cycles, nose foams felt brittle. The yellow  
457 markings denote the thickness of each nose foam. The HPGP and HPV cycles run are essentially  
458 similar (e.g., H<sub>2</sub>O<sub>2</sub> concentration and experimental conditions) except for the plasma phase of  
459 HPGP. Since HPV did not induce nose foam degradation, these results suggest the hydroxyl and  
460 hydroperoxyl radicals from the plasma oxidize the polyurethane nose foams across N95 models.

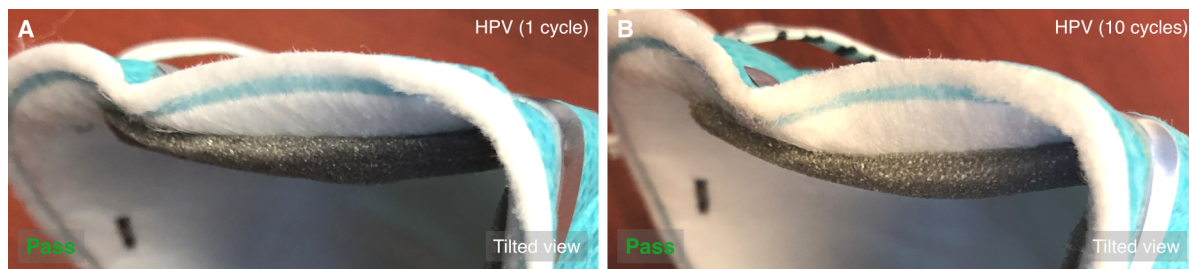

461  
462 **Figure S10.** HPV (STERIS V-PRO® maX) reprocessing maintains the polyurethane nose foam  
463 of N95 FFRs for at least 10 cycles. Tilted images of the nose foam of 3M 1860S FFRs after 1  
464 cycle (A) and 10 cycles (B) of HPV reprocessing. Pass refers to the results from quantitative fit  
465 testing. In addition, there was no noticeable impact on the feel of the nose foam up to 10 cycles.



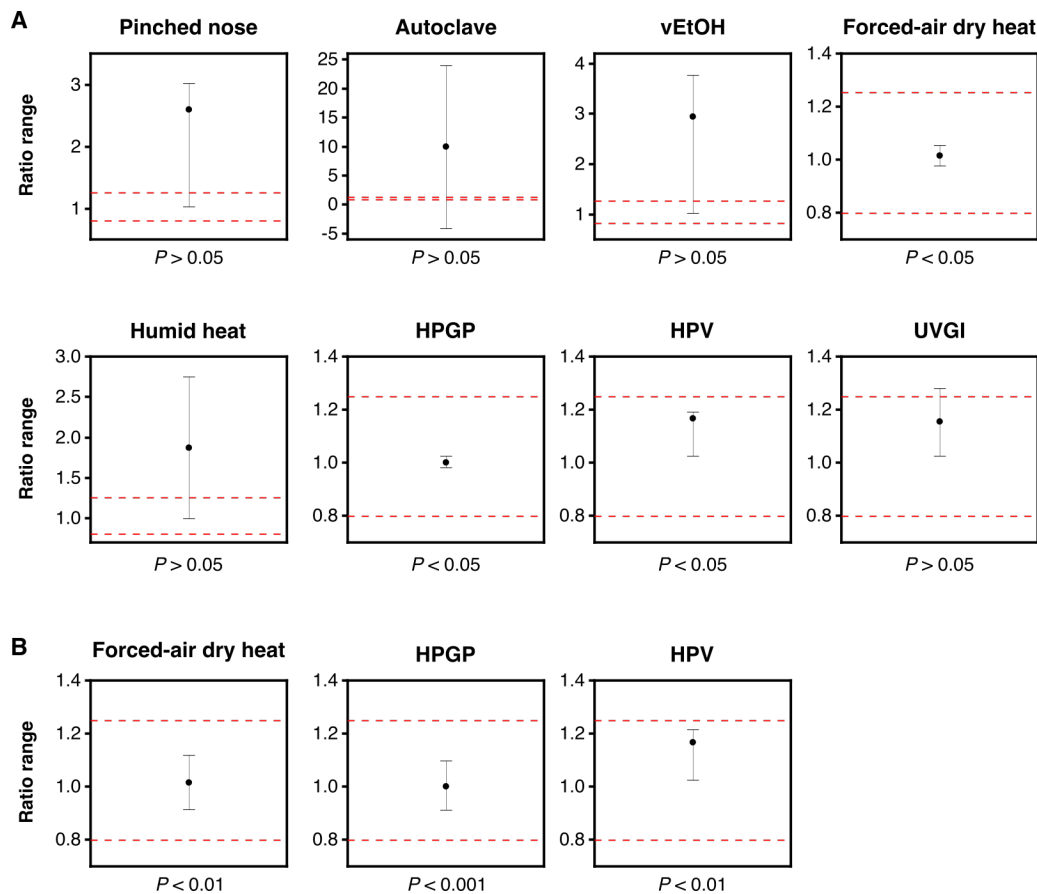

466

467 **Figure S11.** Equivalence testing compares the overall transmission of pristine N95 FFRs with

468 that of improperly worn N95 FFRs (pinched nose clip) or those that have been reprocessed for 1

469 cycle via the seven methods (geometric mean ratio, upper equivalence bound = 1.25, lower

470 equivalence bound = 0.80) with  $\alpha = 0.05$  (A) or  $\alpha = 0.01$  or  $\alpha = 0.001$  (B). The dots and I bars

471 represent the geometric mean ratios and their  $100(1 - 2\alpha)\%$  confidence intervals, respectively.

472 The red dashed lines represent the upper and lower equivalence bounds. The  $P$ -value inequalities

473 are reported below each plot.

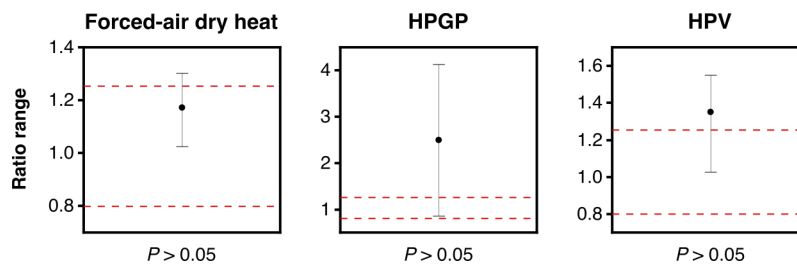

474  
475 **Figure S12.** Equivalence testing compares the overall transmission of pristine N95 FFRs with  
476 reprocessed ones for 3 cycles via forced-air dry heat (100 °C), HPGP (STERRAD® 100S) or  
477 HPV (STERIS V-PRO® maX) (geometric mean ratio, upper equivalence bound = 1.25, lower  
478 equivalence bound = 0.80,  $\alpha = 0.05$ ). The dots and I bars represent the geometric mean ratios and  
479 their 100(1 - 2 $\alpha$ )% confidence intervals, respectively. The red dashed lines represent the upper  
480 and lower equivalence bounds. The *P*-value inequalities are reported below each plot.

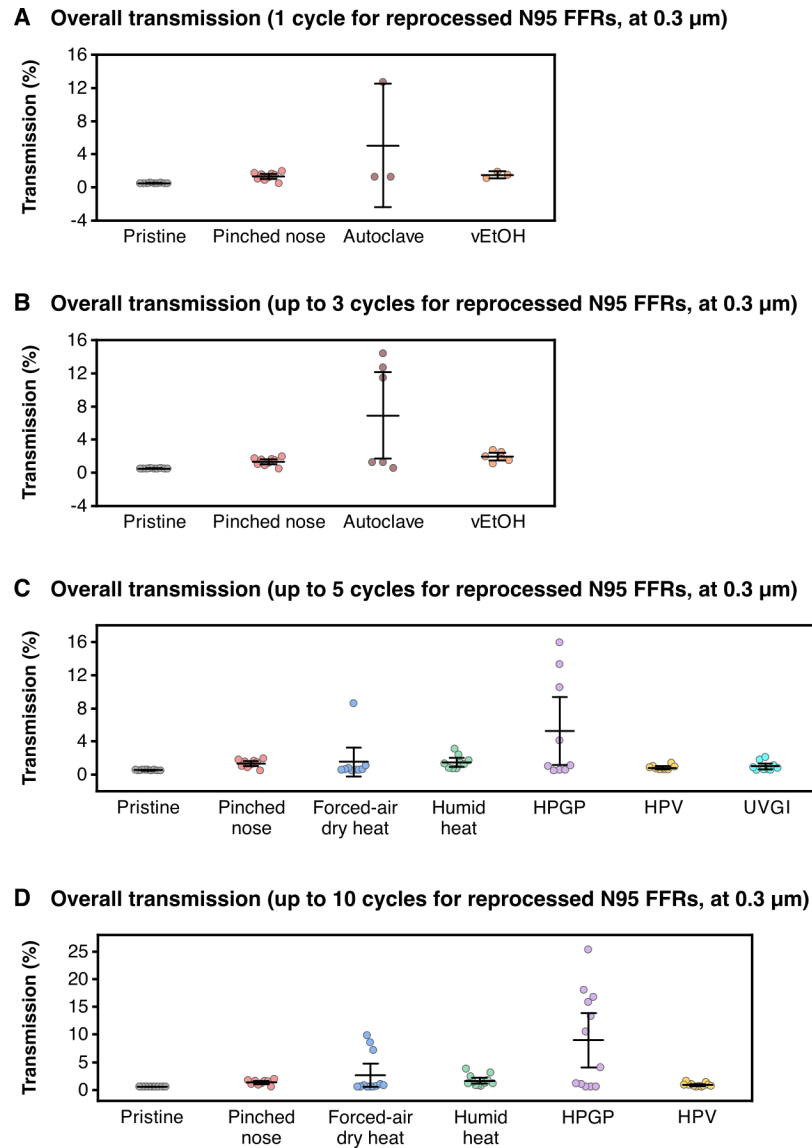

481  
482 **Figure S13.** Comparison of the overall transmission for pristine N95 FFRs, improperly worn  
483 pristine N95 FFRs (pinched nose clip) and those that have been reprocessed for 1 (A), 3 (B), 5  
484 (C) or 10 (D) cycles. Individual data points represent the expectation values from power  
485 regressions at an aerosol size of 0.3  $\mu\text{m}$ . Data included in the main body (Fig. 1) are excluded in  
486 this supplementary figure. A reprocessing method was excluded in (C) (autoclave and vEtOH)  
487 and (D) (UVGI) if it was not run for the respective number of cycles. The middle bars and I bars  
488 represent the estimate mean and its 95% confidence interval, respectively.  
489

490 Supplementary table

491 **Table S1.** Summary of the aerosol transmission characteristics of pristine and reprocessed N95  
 492 FFRs.

| Reprocessing method          | Model of N95 FFR evaluated | Number of reprocessing cycles | Leakage (%) <sup>†</sup> | Expected penetration* (%; 0.3 μm) | 95% confidence interval* (%) | R <sup>2</sup> * | Pressure differential (mmH <sub>2</sub> O) |
|------------------------------|----------------------------|-------------------------------|--------------------------|-----------------------------------|------------------------------|------------------|--------------------------------------------|
| Pristine (not reprocessed)   | 3M 1860S                   | 0                             | ≤0.49 ± 0                | 0.024                             | (0.013, 0.035)               | 0.94             | 3.6                                        |
|                              | 3M 8210                    | 0                             | ≤0.49 ± 0                | 0.025                             | (0.012, 0.037)               | 0.97             | 2.1                                        |
|                              | 3M 9210                    | 0                             | ≤0.49 ± 0                | 0.019                             | (0.013, 0.024)               | 0.97             | 2.8                                        |
| Autoclave                    | 3M 1860S                   | 1                             | 12.50                    | 0.195                             | (0.151, 0.238)               | 0.94             | 4.6                                        |
|                              |                            | 3                             | 11.11                    | 0.315                             | (0.273, 0.356)               | 0.99             | 4.3                                        |
|                              | 3M 8210                    | 1                             | 0.74                     | 0.488                             | (0.446, 0.529)               | 0.96             | 3.3                                        |
|                              |                            | 3                             | 14.29                    | 0.057                             | (0.040, 0.074)               | 0.96             | 3.3                                        |
|                              | 3M 9210                    | 1                             | ≤0.49                    | 0.789                             | (0.717, 0.860)               | 0.99             | 3.3                                        |
|                              |                            | 3                             | ≤0.49                    | 0.071                             | (0.043, 0.098)               | 0.93             | 3.3                                        |
| vEtOH (70%)                  | 3M 1860S                   | 1                             | 0.93                     | 0.972                             | (0.845, 1.099)               | 0.92             | 3.6                                        |
|                              |                            | 3                             | 1.22                     | 1.246                             | (0.963, 1.528)               | 0.95             | 4.3                                        |
|                              | 3M 8210                    | 1                             | ≤0.49                    | 0.633                             | (0.540, 0.726)               | 0.93             | 3.3                                        |
|                              |                            | 3                             | 0.52                     | 1.424                             | (1.251, 1.598)               | 0.92             | 3.3                                        |
|                              | 3M 9210                    | 1                             | ≤0.49                    | 1.014                             | (0.750, 1.278)               | 0.87             | 3.8                                        |
|                              |                            | 3                             | ≤0.49                    | 2.228                             | (1.974, 2.481)               | 0.95             | 3.3                                        |
| Forced-air dry heat (100 °C) | 3M 1860S                   | 1                             | 0.51                     | 0.029                             | (0.017, 0.042)               | 0.94             | 4.6                                        |
|                              |                            | 3                             | ≤0.49                    | 0.310                             | (0.239, 0.381)               | 0.93             | 4.6                                        |
|                              |                            | 5                             | ≤0.49                    | 0.562                             | (0.531, 0.594)               | 0.99             | 4.6                                        |
|                              |                            | 10                            | 0.57                     | 9.259                             | (8.478, 10.040)              | 0.93             | 4.3                                        |
|                              | 3M 8210                    | 1                             | ≤0.49                    | 0.010                             | (0.003, 0.016)               | 0.95             | 4.1                                        |
|                              |                            | 3                             | ≤0.49                    | 0.156                             | (0.145, 0.167)               | 0.97             | 3.6                                        |
|                              |                            | 5                             | ≤0.49                    | 8.107                             | (7.862, 8.352)               | 0.97             | 3.6                                        |
|                              |                            | 10                            | ≤0.49                    | 6.638                             | (5.955, 7.322)               | 0.87             | 3.3                                        |
|                              | 3M 9210                    | 1                             | ≤0.49                    | 0.036                             | (0.027, 0.045)               | 0.97             | 3.3                                        |
|                              |                            | 3                             | 0.55                     | 0.024                             | (0.018, 0.030)               | 0.99             | 3.6                                        |
|                              |                            | 5                             | ≤0.49                    | 0.046                             | (0.028, 0.065)               | 0.95             | 3.3                                        |
|                              |                            | 10                            | 0.50                     | 0.265                             | (0.199, 0.331)               | 0.93             | 3.8                                        |
| Humid heat (75% RH, 75 °C)   | 3M 1860S                   | 1                             | 0.55                     | 0.151                             | (0.129, 0.173)               | 0.96             | 4.1                                        |
|                              |                            | 3                             | 0.52                     | 0.244                             | (0.225, 0.263)               | 0.99             | 4.1                                        |
|                              |                            | 5                             | 0.51                     | 1.195                             | (1.127, 1.263)               | 0.91             | 4.3                                        |
|                              |                            | 10                            | 0.60                     | 0.584                             | (0.510, 0.658)               | 0.80             | 4.3                                        |
|                              | 3M 8210                    | 1                             | 0.51                     | 0.231                             | (0.192, 0.270)               | 0.84             | 3.0                                        |
|                              |                            | 3                             | 0.52                     | 0.700                             | (0.643, 0.758)               | 0.95             | 3.0                                        |
|                              |                            | 5                             | ≤0.49                    | 1.924                             | (1.783, 2.065)               | 0.89             | 3.6                                        |
|                              |                            | 10                            | 0.83                     | 0.280                             | (0.240, 0.320)               | 0.89             | 3.3                                        |
|                              | 3M 9210                    | 1                             | ≤0.49                    | 0.945                             | (0.793, 1.098)               | 0.93             | 3.6                                        |
|                              |                            | 3                             | ≤0.49                    | 0.849                             | (0.764, 0.934)               | 0.99             | 4.3                                        |
|                              |                            | 5                             | ≤0.49                    | 2.591                             | (2.325, 2.858)               | 0.83             | 3.3                                        |
|                              |                            | 10                            | 0.51                     | 3.239                             | (3.084, 3.393)               | 0.98             | 2.8                                        |
| HPGP (STERRAD® 100S)         | 3M 1860S                   | 1                             | ≤0.49                    | 0.029                             | (0.026, 0.032)               | 0.99             | 4.3                                        |
|                              |                            | 3                             | ≤0.49                    | 0.504                             | (0.457, 0.551)               | 0.97             | 4.3                                        |
|                              |                            | 5                             | 4.00                     | 9.271                             | (8.762, 9.780)               | 0.92             | 4.3                                        |
|                              |                            | 10                            | 11.11                    | 14.274                            | (13.914, 14.633)             | 0.94             | 4.1                                        |
|                              | 3M 8210                    | 1                             | ≤0.49                    | 0.013                             | (0.007, 0.019)               | 0.94             | 3.0                                        |
|                              |                            | 3                             | ≤0.49                    | 3.576                             | (3.290, 3.862)               | 0.94             | 3.3                                        |
|                              |                            | 5                             | 4.00                     | 6.494                             | (6.230, 6.757)               | 0.92             | 3.0                                        |
|                              |                            | 10                            | 11.11                    | 6.914                             | (6.221, 7.606)               | 0.89             | 3.3                                        |

|                            |          |    |       |        |                 |      |     |
|----------------------------|----------|----|-------|--------|-----------------|------|-----|
|                            | 3M 9210  | 1  | ≤0.49 | 0.027  | (0.011, 0.043)  | 0.96 | 3.8 |
|                            |          | 3  | ≤0.49 | 0.589  | (0.473, 0.706)  | 0.84 | 3.8 |
|                            |          | 5  | 14.29 | 1.607  | (1.291, 1.924)  | 0.91 | 3.0 |
|                            |          | 10 | 6.67  | 10.108 | (9.271, 10.945) | 0.95 | 4.1 |
| HPV<br>(STERIS V-Pro® maX) | 3M 1860S | 1  | ≤0.49 | 0.118  | (0.098, 0.137)  | 0.97 | 4.6 |
|                            |          | 3  | ≤0.49 | 0.182  | (0.137, 0.226)  | 0.94 | 4.8 |
|                            |          | 5  | 0.51  | 0.849  | (0.686, 1.013)  | 0.97 | 4.8 |
|                            |          | 10 | 0.58  | 0.887  | (0.651, 1.123)  | 0.93 | 4.3 |
|                            | 3M 8210  | 1  | ≤0.49 | 0.109  | (0.092, 0.126)  | 0.97 | 4.3 |
|                            |          | 3  | ≤0.49 | 0.163  | (0.137, 0.189)  | 0.93 | 3.8 |
|                            |          | 5  | 0.57  | 0.277  | (0.230, 0.324)  | 0.98 | 3.6 |
|                            |          | 10 | 0.52  | 0.149  | (0.129, 0.169)  | 0.99 | 3.8 |
|                            | 3M 9210  | 1  | ≤0.49 | 0.098  | (0.081, 0.115)  | 0.98 | 4.6 |
|                            |          | 3  | ≤0.49 | 0.541  | (0.492, 0.589)  | 0.98 | 4.3 |
|                            |          | 5  | ≤0.49 | 0.424  | (0.364, 0.484)  | 0.96 | 4.3 |
|                            |          | 10 | ≤0.49 | 0.378  | (0.338, 0.418)  | 0.98 | 4.3 |
| UVGI                       | 3M 1860S | 1  | 0.55  | 0.064  | (0.054, 0.074)  | 0.99 | 4.6 |
|                            |          | 3  | 0.81  | 0.956  | (0.639, 1.273)  | 0.94 | 4.6 |
|                            |          | 5  | 0.96  | 1.121  | (1.003, 1.238)  | 0.96 | 4.6 |
|                            | 3M 8210  | 1  | 0.54  | 0.097  | (0.061, 0.134)  | 0.97 | 3.6 |
|                            |          | 3  | ≤0.49 | 0.601  | (0.477, 0.726)  | 0.96 | 3.8 |
|                            |          | 5  | 0.51  | 0.258  | (0.186, 0.330)  | 0.96 | 3.6 |
|                            | 3M 9210  | 1  | ≤0.49 | 0.035  | (0.032, 0.039)  | 0.99 | 3.0 |
|                            |          | 3  | ≤0.49 | 0.083  | (0.050, 0.116)  | 0.96 | 3.3 |
|                            |          | 5  | ≤0.49 | 0.340  | (0.256, 0.424)  | 0.97 | 4.6 |

493 †The limit of detection for leakage was 0.49%. Leakage for pristine N95 FFRs is reported as

494 mean values and their standard errors ( $N = 3$ ).

495 \*The expectation values, confidence intervals and coefficients of determination are from power

496 regression performed on penetration measurements.

497 Author contributions

498 P.Z.C. designed the study, performed experiments, analyzed results and prepared visualizations.

499 A.N. and N.M. performed experiments. J.T.M., G.H.B., O.D.R. and F.X.G. supervised the

500 research. P.Z.C. and F.X.G. wrote the manuscript with review from all authors.

501

502 Acknowledgements

503 We would like to thank Jeffrey Sun, Febby Wong, Yang Ting Shek and Ayoob Ghalami at the

504 University of Toronto for assistance with fit testing and procurement; Ronald Hofmann and

505 Chengjin Wang at the University of Toronto for use of their fiber optic spectrometer and

506 discussions; and Stephenie Naugler and William Lau at St. Michael's Hospital for assistance

507 with reprocessing instrumentation. This research was supported by the Natural Sciences and

508 Engineering Research Council of Canada (NSERC), the University of Toronto COVID-19

509 Action Grant, the Hospital for Sick Children and Unity Health Toronto. P.Z.C. was supported by

510 the NSERC Vanier Scholarship. F.X.G. was partially supported by the NSERC Senior Industrial

511 Research Chair program.

512

513 Supplementary references

514 6. TEB-APR-STP-0059: Determination of particulate filter efficiency level for N95 series

515 filters Against solid particulates for non-powered, air-purifying respirators (revision: 3.2).

516 Cincinnati, OH: National Institute for Occupational Safety and Health, December 2019

517 (<https://www.cdc.gov/niosh/npptl/stps/pdfs/TEB-APR-STP-0059-508.pdf>).

- 518 7. Institute of Medicine (U.S). Committee on the development of reusable facemasks for use  
519 during an influenza pandemic. reusability of facemasks during an influenza pandemic:  
520 Facing the flu. Washington, D.C.: National Academies Press; 2006.
- 521 8. Tang JW, Noakes CJ, Nielsen PV, et al. Observing and quantifying airflows in the  
522 infection control of aerosol- and airborne-transmitted diseases: an overview of approaches.  
523 J Hosp Infect 2011;77:213-22.
- 524 9. Reid JP, Mitchem L. Laser probing of single-aerosol droplet dynamics. Annu Rev Phys  
525 Chem 2006;57:245-71.
- 526 10. Maxey MR, Riley JJ. Equation of motion for a small rigid sphere in a nonuniform flow.  
527 Physics of Fluids 1983;26:883-9.
- 528 11. Nowak N, Kakade PP, Annapragada AV. Computational fluid dynamics simulation of  
529 airflow and aerosol deposition in human lungs. Ann Biomed Eng 2003;31:374-90.
- 530 12. Liu Y, Ning Z, Chen Y, et al. Aerodynamic analysis of SARS-CoV-2 in two Wuhan  
531 hospitals. Nature 2020 April 27 (Epub ahead of print).
- 532 13. Lu J, Gu J, Li K, et al. COVID-19 outbreak associated with air conditioning in restaurant,  
533 Guangzhou, China, 2020. Emerg Infect Dis 2020;26.
- 534 14. Li Q, Guan X, Wu P, et al. Early transmission dynamics in Wuhan, China, of novel  
535 coronavirus-infected pneumonia. N Engl J Med 2020;382:1199-207.
- 536 15. Wang X, Pan Z, Cheng Z. Association between 2019-nCoV transmission and N95  
537 respirator use. J Hosp Infect 2020;105:104-5.
- 538 16. Chen N, Zhou M, Dong X, et al. Epidemiological and clinical characteristics of 99 cases of  
539 2019 novel coronavirus pneumonia in Wuhan, China: a descriptive study. Lancet  
540 2020;395:507-13.

- 541 17. Bouvier NM, Palese P. The biology of influenza viruses. *Vaccine* 2008;26 Suppl 4:D49-  
542 53.
- 543 18. Judson SD, Munster VJ. Nosocomial transmission of emerging viruses via aerosol-  
544 generating medical procedures. *Viruses* 2019;11.
- 545 19. Tellier R. Review of aerosol transmission of influenza A virus. *Emerg Infect Dis*  
546 2006;12:1657-62.
- 547 20. Tang JW, Li Y, Eames I, Chan PK, Ridgway GL. Factors involved in the aerosol  
548 transmission of infection and control of ventilation in healthcare premises. *J Hosp Infect*  
549 2006;64:100-14.
- 550 21. Kumar A, Kasloff SB, Leung A, et al. N95 mask decontamination using standard hospital  
551 sterilization technologies. medRxiv 2020, April 20, 2020  
552 (<https://www.medrxiv.org/content/10.1101/2020.04.05.20049346v2>).
- 553 22. Letter of emergency use authorization: STERIS sterilization systems. Silver Spring, MD:  
554 U.S. Food and Drug Administration, April 9, 2020  
555 (<https://www.fda.gov/media/136843/download>).
- 556 23. Letter of emergency use authorization: ASP STERRAD Sterilization Systems. Silver  
557 Spring, MD: U.S. Food and Drug Administration, April 11, 2020  
558 (<https://www.fda.gov/media/136843/download>).
- 559 24. Fischer R, Morris DH, van Doremalen N, et al. Assessment of N95 respirator  
560 decontamination and re-use for SARS-CoV-2. medRxiv April 24, 2020  
561 (<https://www.medrxiv.org/content/10.1101/2020.04.11.20062018v2>).
- 562 25. Wang T, Lien C, Liu S, Selveraj P. Effective heat inactivation of SARS-CoV-2. medRxiv  
563 May 5, 2020 (<https://www.medrxiv.org/content/10.1101/2020.04.29.20085498v1>).



- 564 26. Liao L, Xiao W, Zhao M, et al. Can N95 respirators be reused after disinfection? How  
565 many times? ACS Nano 2020 May 5 (Epub ahead of print).
- 566 27. Mills D, Harnish DA, Lawrence C, Sandoval-Powers M, Heimbuch BK. Ultraviolet  
567 germicidal irradiation of influenza-contaminated N95 filtering facepiece respirators. Am J  
568 Infect Control 2018;46:e49-e55.
- 569 28. Jenum J. Penetration of ambient aerosols through respirator face seal leaks (Application  
570 Note ITI-055), 1995 ([https://www.tsi.com/getmedia/d4de5465-b3ed-4ab1-bc3a-  
571 cb6b5c77c50b/Penetration-of-Ambient-Aerosols-App-Note-ITI-055-US?ext=.pdf](https://www.tsi.com/getmedia/d4de5465-b3ed-4ab1-bc3a-cb6b5c77c50b/Penetration-of-Ambient-Aerosols-App-Note-ITI-055-US?ext=.pdf)).
- 572 29. Brosseau LM. Fit testing respirators for public health medical emergencies. J Occup  
573 Environ Hyg 2010;7:628-32.
- 574 30. Roberge RJ, Monaghan WD, Palmiero AJ, Shaffer R, Bergman MS. Infrared imaging for  
575 leak detection of N95 filtering facepiece respirators: a pilot study. Am J Ind Med  
576 2011;54:628-36.
- 577 31. Grinshpun SA, Haruta H, Eninger RM, Reponen T, McKay RT, Lee SA. Performance of  
578 an N95 filtering facepiece particulate respirator and a surgical mask during human  
579 breathing: two pathways for particle penetration. J Occup Environ Hyg 2009;6:593-603.
- 580 32. AIA Academy of Architecture for Health., Facilities Guidelines Institute., United States.  
581 Department of Health and Human Services. Guidelines for design and construction of  
582 hospital and health care facilities. Washington, D.C.: The American Institute of Architects;  
583 2001.
- 584 33. ASTM F2299 / F2299M-03(2017), Standard test method for determining the initial  
585 efficiency of materials used in medical face masks to penetration by particulates using

- 586 latex spheres. West Conshohocken, PA: ASTM International, 2017
- 587 (<https://www.astm.org/Standards/F2299.htm>).
- 588 34. ASTM F2100-19, Standard specification for performance of materials used in medical face
- 589 masks. West Conshohocken, PA: ASTM International, 2019
- 590 (<https://www.astm.org/Standards/F2100.htm>).
- 591 35. Mahdavi A, Haghghat F, Bahloul A, Brochot C, Ostiguy C. Particle loading time and
- 592 humidity effects on the efficiency of an N95 filtering facepiece respirator model under
- 593 constant and inhalation cyclic flows. *Ann Occup Hyg* 2015;59:629-40.
- 594 36. Wellek S. Testing statistical hypotheses of equivalence and noninferiority. 2nd ed. Boca
- 595 Raton: CRC Press; 2010.
- 596 37. Łowkis B, Motyl E. Electret properties of polypropylene fabrics. *Journal of Electrostatics*
- 597 2001;51-52:232-8.
